# Supplementary material
Source: publisher figshare collection journal article supplement (https://sage.figshare.com/ndownloader/files/17785463)
Supplement: Supplementary file 1 [file 17785463]

## Supplementary Material

### Nitrogen-doped carbon dots as a probe for the detection of $\text{Cu}^{2+}$ and its cellular imaging

Ning Wang<sup>1</sup>, Xuebing Li<sup>1</sup>, Xuefang Yang<sup>1</sup>, Zenglian Tian<sup>2</sup>, Wei Bian<sup>\*1</sup>, Weihua Jia<sup>\*2</sup>

<sup>1</sup>Shanxi Medical University, Taiyuan 030031

<sup>2</sup>Sixth Hospital of Shanxi Medical University. Taiyuan 030001.

Corresponding author. Email: sxykdx\_bianwei@163.com

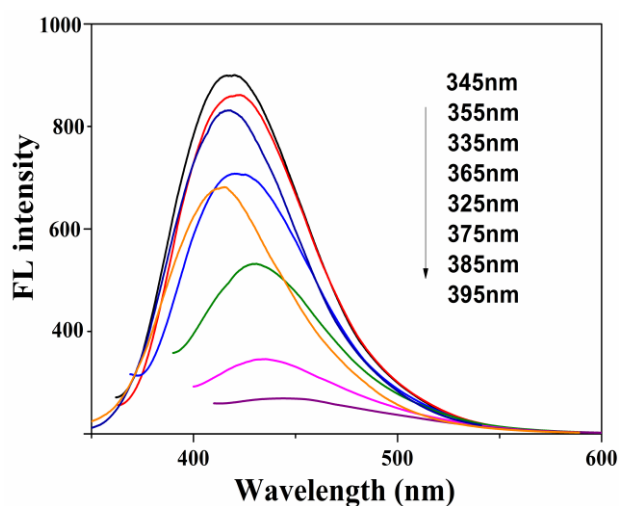

**Figure. S1** Fluorescence emission spectra of NCDs under different excitation wavelengths

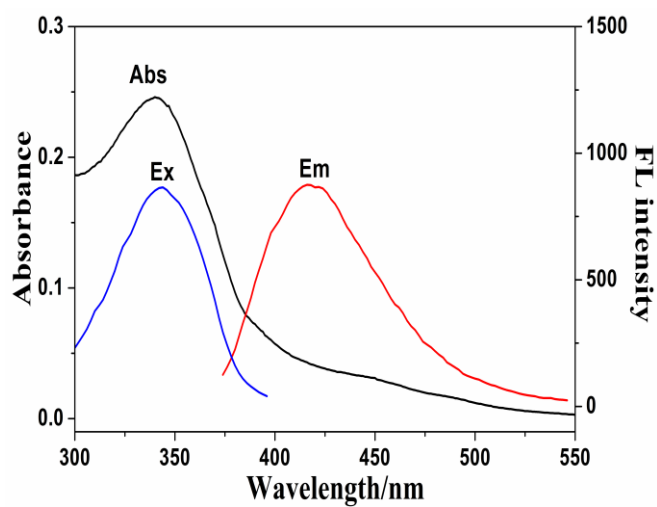

**Figure. S2** The UV-visible absorption spectra, fluorescence excitation (Ex) and

emission spectra (Em) of NCDs

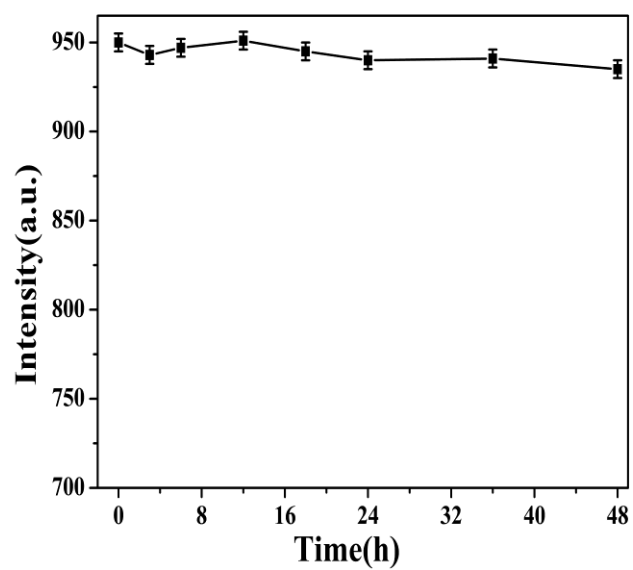

**Figure. S3** The effect of exposure to sunlight on fluorescence intensity of N-CDs

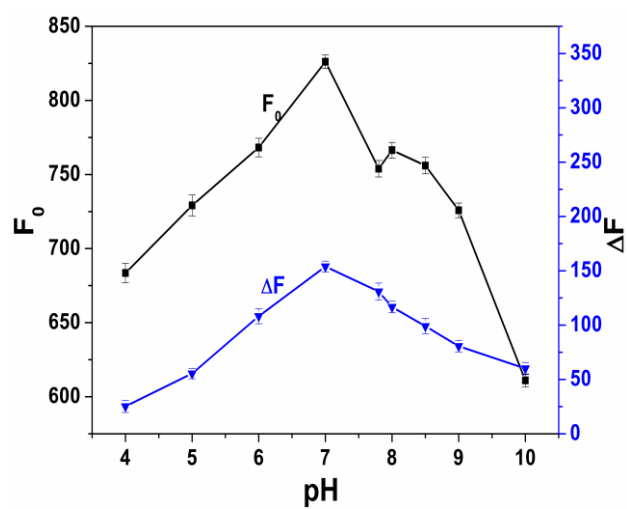

**Figure. S4** The effect of pH on fluorescence intensity of NCDs and  $\text{Cu}^{2+}$ -

NCDs reaction system

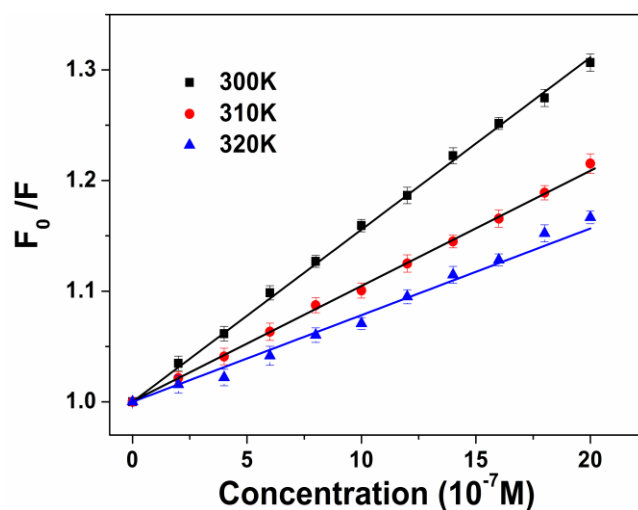

**Figure. S5** The effect of NCDs concentration on the detection of  $\text{Cu}^{2+}$

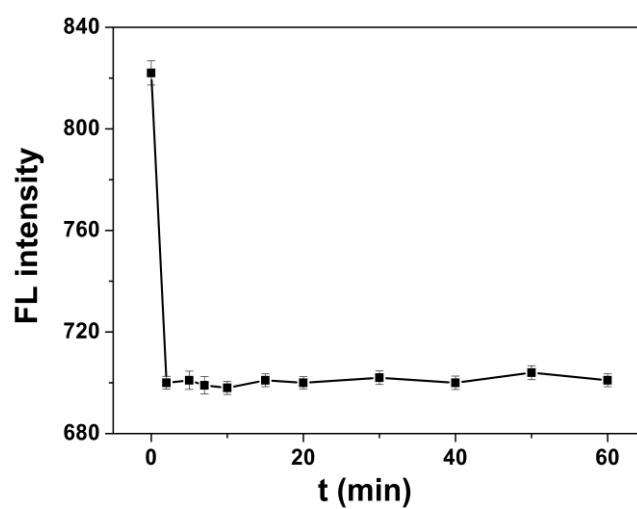

**Figure. S6** The effect of reaction time on fluorescence intensity of  $\text{Cu}^{2+}$ -NCDs

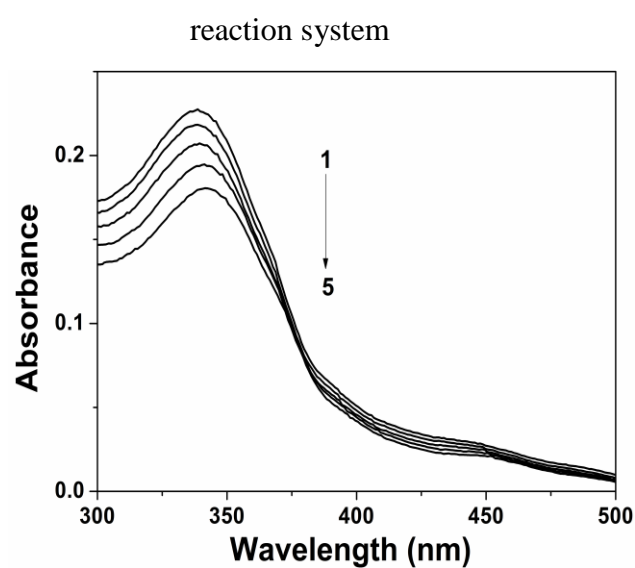

**Figure. S7** The effects of different concentrations of  $\text{Cu}^{2+}$  on UV-vis spectra of

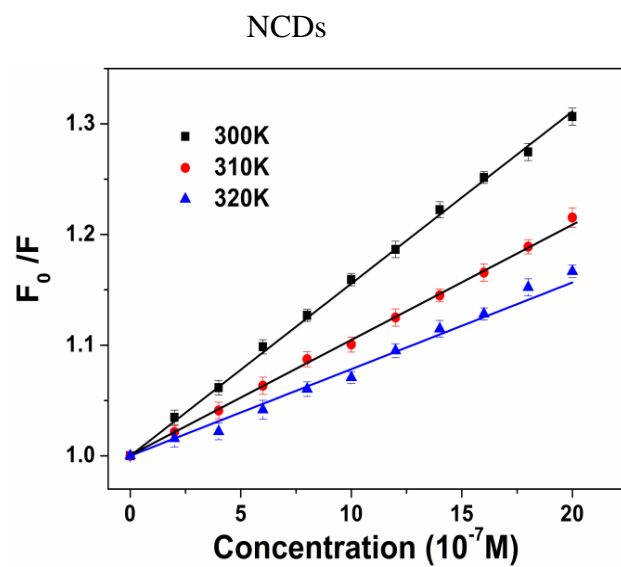

**Figure. S8** The effect of temperature on fluorescence intensity of  $\text{Cu}^{2+}$ -NCDs

system
